# Supplementary material for: Disclosing the Potential of Fluorinated Ionic Liquids as Interferon-Alpha 2b Delivery Systems
Source: MDPI journal article supplement (doi:10.3390/nano12111851), 2022-05-28
Supplement: s1 [file s1]

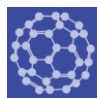

## Supplementary Materials

# Disclosing the Potential of Fluorinated Ionic Liquids as Interferon-Alpha 2b Delivery Systems

Margarida L. Ferreira, Nicole S. M. Vieira, Ana L. S. Oliveira, João M. M. Araújo \* and Ana B. Pereira \*

LAQV, REQUIMTE, Department of Chemistry, NOVA School of Science and Technology, NOVA University Lisbon, 2829-516 Caparica, Portugal; mal.ferreira@campus.fct.unl.pt (M.L.F.); ns.vieira@campus.fct.unl.pt (N.S.M.V.); als.oliveira@campus.fct.unl.pt (A.L.S.O.)

\* Correspondence: jmmda@fct.unl.pt (J.M.M.A.); anab@fct.unl.pt (A.B.P.); Tel.: +351-21-294-8300

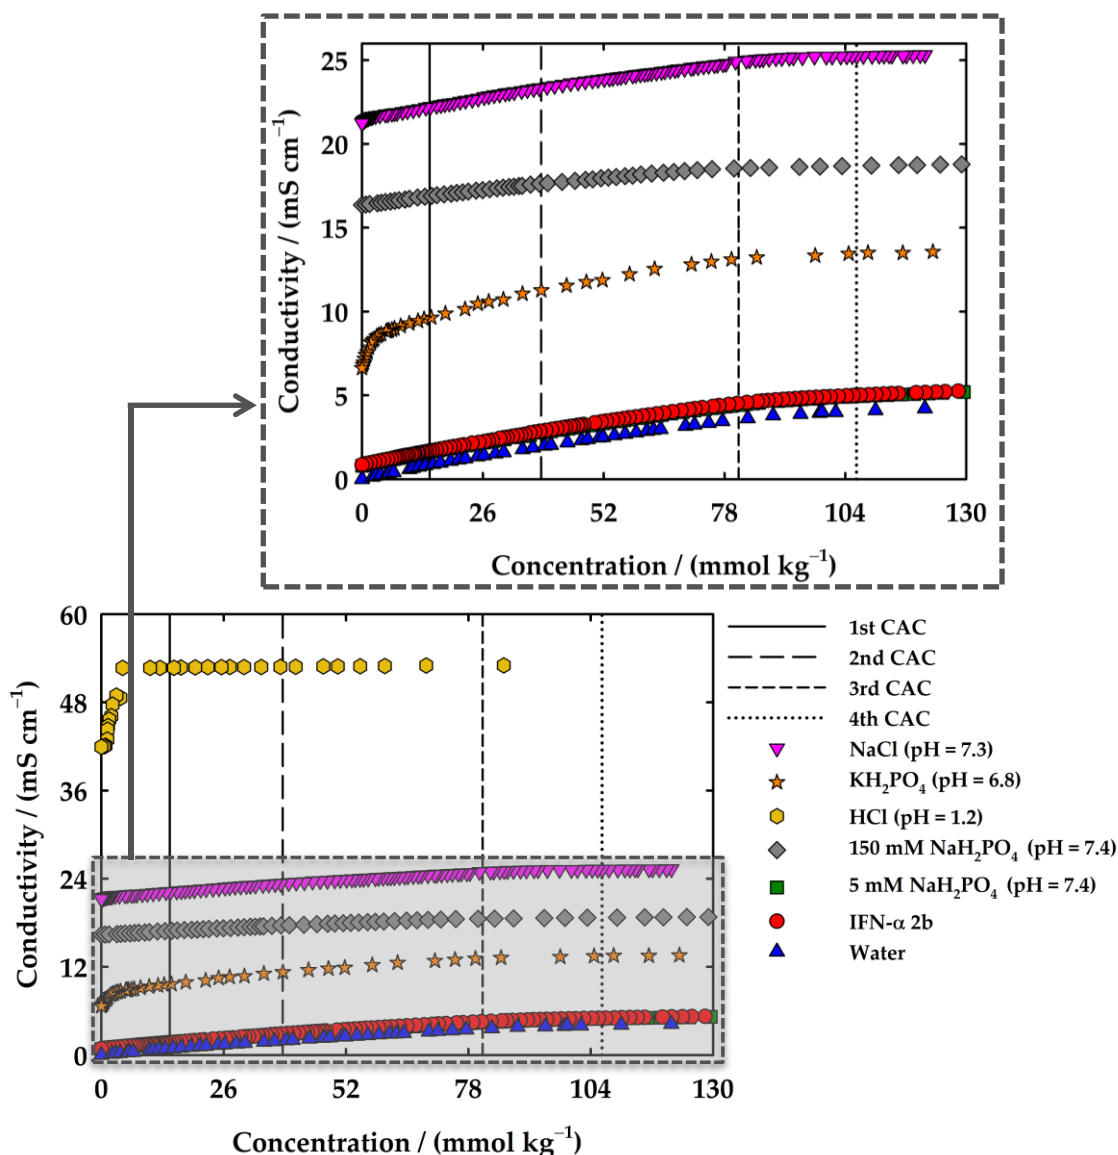

**Figure S1.** Conductivity profile of  $[C_2C_1Im][C_4F_9SO_3]$  at 25°C from 0 to ~130 mM at different conditions: (i) 150 mM of NaCl at pH=7.3 (pink,  $\blacktriangledown$ ); (ii) 25 mM of  $KH_2PO_4$  at pH=6.8 (orange,  $\star$ ); (iii) 100 mM of HCl at pH 1.2 (yellow,  $\bullet$ ); (iv) 150 mM of  $NaH_2PO_4$  at pH 7.4 (grey,  $\blacklozenge$ ); (v) 5 mM of  $NaH_2PO_4$  at pH 7.4 (green,  $\blacksquare$ ); (vi) 5 mM of  $NaH_2PO_4$  at pH 7.4 with 10  $\mu g/mL$  of IFN- $\alpha$  2b (red,  $\bullet$ ); and (vii) water (blue,  $\blacktriangle$ ) [1] to comparison purposes. The lines represent the different CACs of  $[C_2C_1Im][C_4F_9SO_3]$  in water [1].

**Table S1.** Critical aggregation concentrations, CACs, ionization degree,  $\alpha$ , and Gibbs free energy of aggregation,  $\Delta G^0_{\text{agg}}$ , of the systems with [C<sub>2</sub>C<sub>1</sub>Im][C<sub>4</sub>F<sub>9</sub>SO<sub>3</sub>] determined by conductometry at 25°C

|               |                                                      | 150 mM NaCl<br>(pH=7.3) | 25 mM KH <sub>2</sub> PO <sub>4</sub><br>(pH=6.8) | 100 mM HCl<br>(pH=1.2) | 150 mM<br>NaH <sub>2</sub> PO <sub>4</sub><br>(pH=7.4) | 5 mM NaH <sub>2</sub> PO <sub>4</sub><br>(pH=7.4) | 10 µg/mL IFN-<br>α 2b + 5 mM<br>NaH <sub>2</sub> PO <sub>4</sub><br>(pH=7.4) | Water <sup>(a)</sup> |
|---------------|------------------------------------------------------|-------------------------|---------------------------------------------------|------------------------|--------------------------------------------------------|---------------------------------------------------|------------------------------------------------------------------------------|----------------------|
| <b>First</b>  | $w_{\text{FIL}}$                                     | 0.0014                  | 0.0008                                            | 0.0019                 | 0.0060                                                 | 0.0056                                            | 0.0062                                                                       | 0.0060               |
|               | CAC                                                  |                         |                                                   |                        |                                                        |                                                   |                                                                              |                      |
|               | $\alpha$                                             |                         |                                                   |                        |                                                        |                                                   |                                                                              |                      |
|               | $\Delta G^0_{\text{agg}}$<br>[kJ mol <sup>-1</sup> ] |                         |                                                   |                        |                                                        |                                                   |                                                                              |                      |
| <b>Second</b> | $w_{\text{FIL}}$                                     | 0.0138                  | 0.0158                                            |                        | 0.0135                                                 | 0.0189                                            | 0.0179                                                                       | 0.0158               |
|               | CAC                                                  |                         |                                                   |                        |                                                        |                                                   |                                                                              |                      |
|               | $\alpha$                                             |                         |                                                   |                        |                                                        |                                                   |                                                                              |                      |
|               | $\Delta G^0_{\text{agg}}$<br>[kJ mol <sup>-1</sup> ] |                         |                                                   |                        |                                                        |                                                   |                                                                              |                      |
| <b>Third</b>  | $w_{\text{FIL}}$                                     | 0.0342                  | 0.0293                                            |                        | 0.0282                                                 | 0.0341                                            | 0.0342                                                                       | 0.0332               |
|               | CAC                                                  |                         |                                                   |                        |                                                        |                                                   |                                                                              |                      |
|               | $\alpha$                                             |                         |                                                   |                        |                                                        |                                                   |                                                                              |                      |
|               | $\Delta G^0_{\text{agg}}$<br>[kJ mol <sup>-1</sup> ] |                         |                                                   |                        |                                                        |                                                   |                                                                              |                      |

(a) Data from reference [1].

**Table S2.** Density,  $\rho$ , and mass fraction,  $w_{\text{FIL}}$ , for the binary system [C<sub>2</sub>C<sub>1</sub>Im][C<sub>4</sub>F<sub>9</sub>SO<sub>3</sub>] + water at 25°C.

| $w_{\text{FIL}}$ | $\rho / \text{g} \cdot \text{cm}^{-3}$ | Reference |
|------------------|----------------------------------------|-----------|
| 1.0000           | 1.5458                                 | [1]       |
| 0.9804           | 1.5257                                 | [1]       |
| 0.9593           | 1.5060                                 | [1]       |
| 0.9418           | 1.4949                                 | [1]       |
| 0.9212           | 1.4765                                 | [1]       |
| 0.8990           | 1.4615                                 | [1]       |
| 0.8686           | 1.4421                                 | [1]       |
| 0.8398           | 1.4270                                 | [1]       |
| 0.7997           | 1.4049                                 | [1]       |
| 0.7801           | 1.3914                                 | [1]       |
| 0.7398           | 1.3603                                 | [1]       |
| 0.6998           | 1.3417                                 | [1]       |
| 0.6496           | 1.3081                                 | [1]       |
| 0.5999           | 1.2773                                 | [1]       |
| 0.5489           | 1.2462                                 | [1]       |
| 0.5001           | 1.2177                                 | [1]       |
| 0.2989           | 1.1135                                 | This work |
| 0.1000           | 1.0353                                 | This work |
| 0.0384           | 1.0104                                 | This work |
| 0.0245           | 1.0048                                 | This work |
| 0.0109           | 0.9994                                 | This work |
| 0.0030           | 0.9965                                 | This work |

**Table S3.** Critical aggregation concentration (CAC), surface properties, and critical packing parameters for [C<sub>2</sub>C<sub>1</sub>Im][C<sub>4</sub>F<sub>9</sub>SO<sub>3</sub>] aqueous solutions determined by the tensiometer and goniometer at 25°C.

|                                    |                                            | 5 mM NaH <sub>2</sub> PO <sub>4</sub> (pH=7.4) | 5 µg/mL IFN-α 2b + 5 mM NaH <sub>2</sub> PO <sub>4</sub> (pH=7.4) |                 |                 |                 | Water <sup>(a)</sup> |
|------------------------------------|--------------------------------------------|------------------------------------------------|-------------------------------------------------------------------|-----------------|-----------------|-----------------|----------------------|
|                                    |                                            |                                                | Breakpoints                                                       |                 |                 |                 |                      |
|                                    |                                            |                                                | 1 <sup>st</sup>                                                   | 2 <sup>nd</sup> | 3 <sup>rd</sup> | 4 <sup>th</sup> |                      |
| <b>Tensiometer</b>                 | CAC ( $w_{FIL}$ )                          | 0.0330                                         | 0.0008                                                            | 0.0025          | 0.0089          | 0.0335          | 0.0375               |
|                                    | CAC (mmol·kg <sup>-1</sup> )               | 80.35                                          | 1.963                                                             | 6.105           | 21.61           | 81.59           | 91.39                |
|                                    | $\gamma_{CAC}$ [mN m <sup>-1</sup> ]       | 24.6                                           | 51.4                                                              | 48.2            | 38.3            | 24.3            | 24.5                 |
|                                    | $10^6 \Gamma_{max}$ [mol m <sup>-2</sup> ] | 3.26                                           | –                                                                 | –               | –               | 4.41            | 2.60                 |
|                                    | $A_{min}$ [nm <sup>2</sup> ]               | 0.51                                           | –                                                                 | –               | –               | 0.38            | 0.64                 |
|                                    | $\Pi_{CAC}$ [mN m <sup>-1</sup> ]          | 46.4                                           | –                                                                 | –               | –               | 37.8            | 44.4                 |
|                                    | $\Delta G^0_{ad}$ [kJ mol <sup>-1</sup> ]  | -41.0                                          | –                                                                 | –               | –               | -32.36          | -44.5                |
| <b>Critical packing parameters</b> | $P_{eq\ 8}^{(b)}$                          | 0.550                                          | –                                                                 | –               | –               | 0.7439          | 0.439                |
|                                    | $P_{eq\ 9}^{(b)}$                          | 0.553                                          | –                                                                 | –               | –               | 0.7481          | 0.442                |
| <b>Goniometer</b>                  | CAC ( $w_{FIL}$ )                          | 0.0329                                         | 0.0009                                                            | 0.0030          | 0.0157          | 0.0430          | –                    |
|                                    | CAC (mmol·kg <sup>-1</sup> )               | 80.27                                          | 2.101                                                             | 7.288           | 38.18           | 104.7           | –                    |

(a) Parameters from reference [1]; (b) the critical packing parameters were obtained by Equations 8 and 9 of the paper.

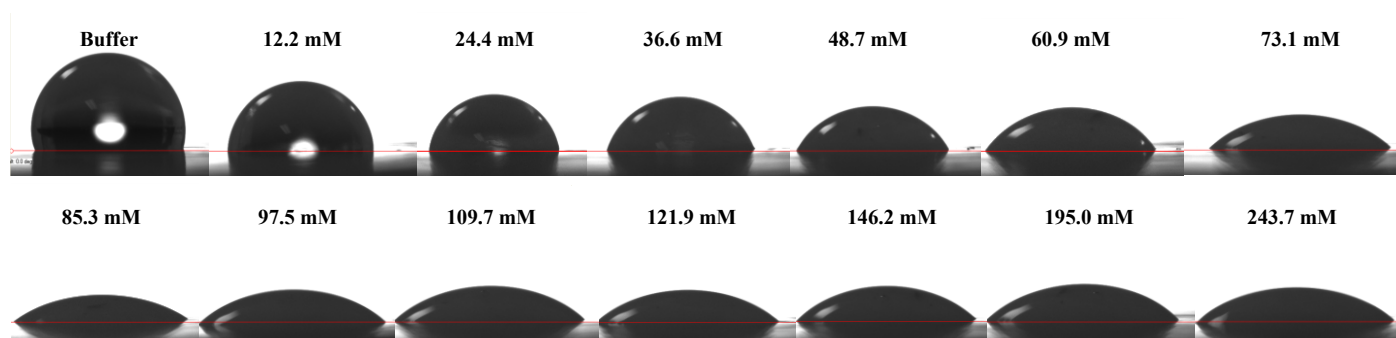**Figure S2.** Drops measured in goniometer at 25°C of [C<sub>2</sub>C<sub>1</sub>Im][C<sub>4</sub>F<sub>9</sub>SO<sub>3</sub>] aqueous solutions at different concentrations in 5 mM NaH<sub>2</sub>PO<sub>4</sub> (pH = 7.4). The red line indicates the surface where the drop was deposit.

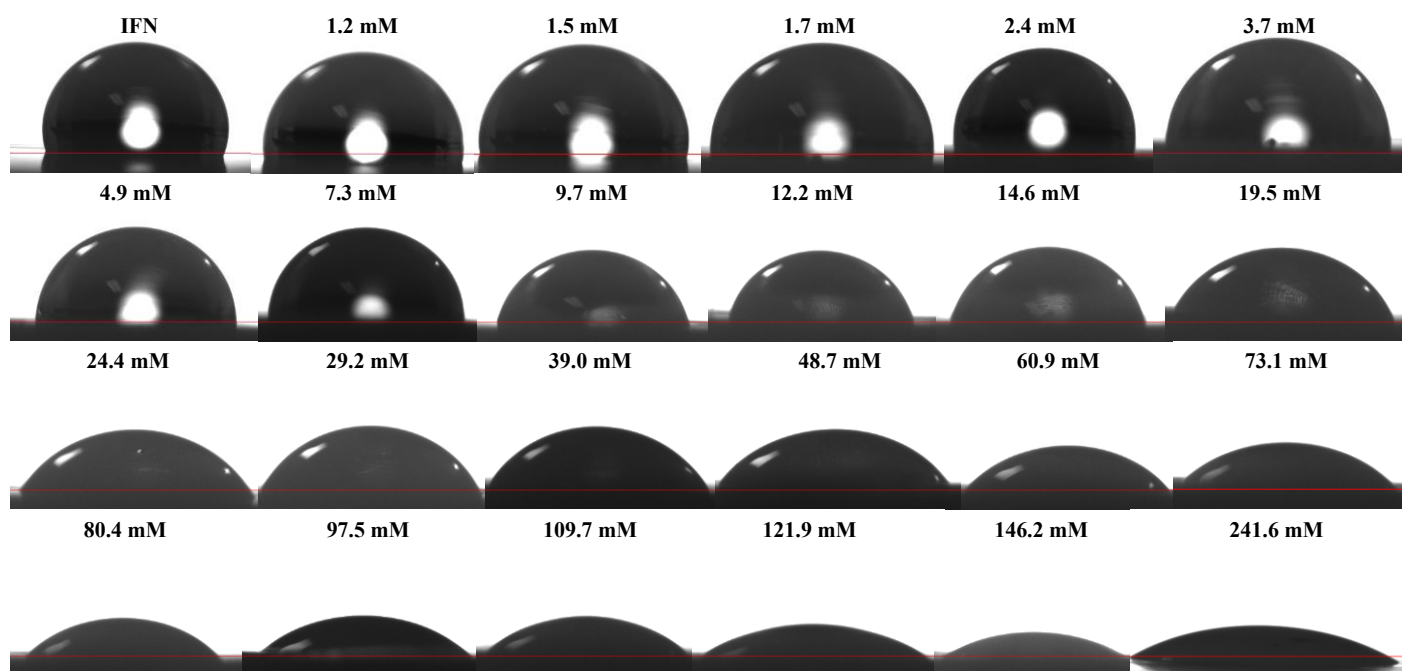

**Figure S3.** Drops measured in goniometer at 25°C of  $[\text{C}_2\text{C}_1\text{Im}][\text{C}_4\text{F}_9\text{SO}_3]$  aqueous solutions at different concentrations with 5 µg/mL of IFN- $\alpha$  2b in 5 mM  $\text{NaH}_2\text{PO}_4$  (pH=7.4). The red line indicates the surface where the drop was deposit.

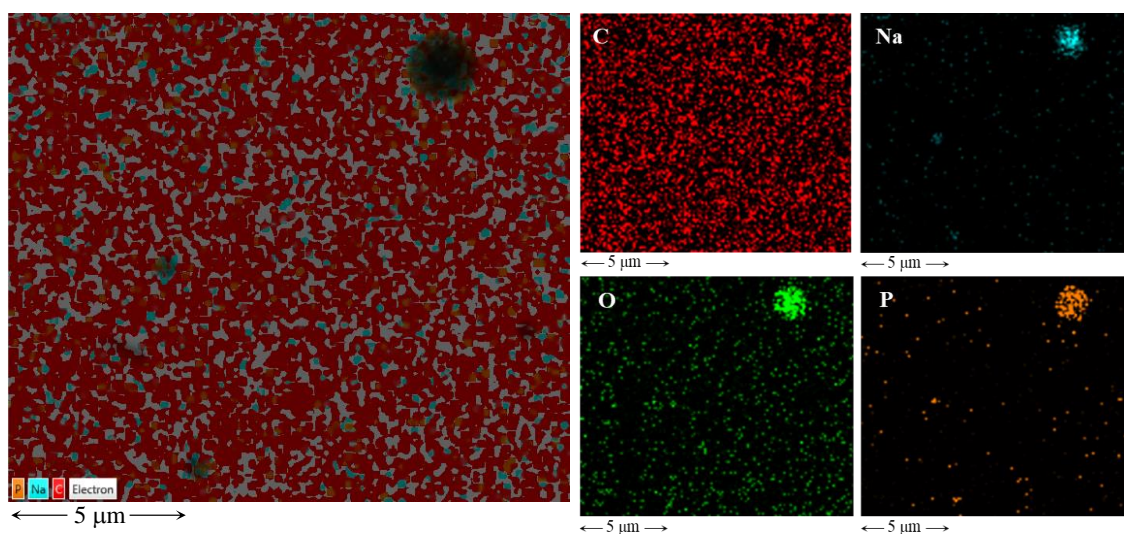

**Figure S4.** EDS analysis of IFN- $\alpha$  2b at 0.0001 µg/mL in 150 mM  $\text{NaH}_2\text{PO}_4$  measured at 25°C.

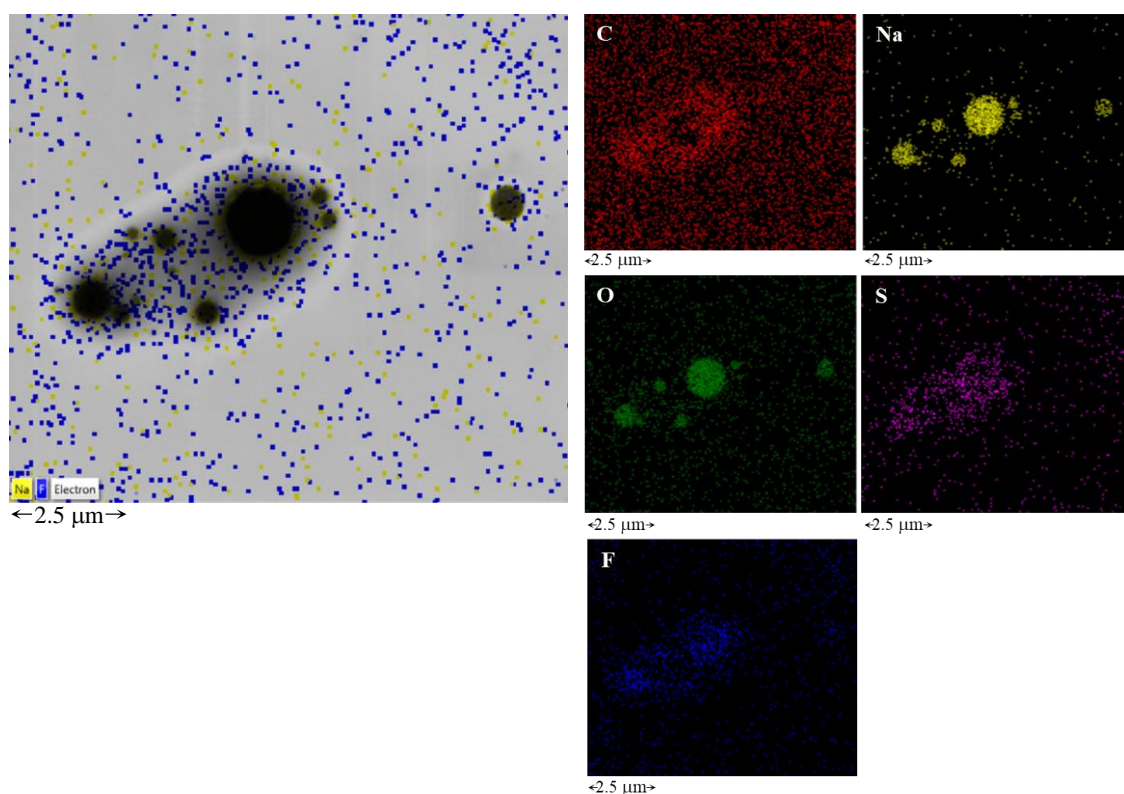

**Figure S5.** EDS analysis of  $[\text{C}_2\text{C}_1\text{Im}][\text{C}_4\text{F}_9\text{SO}_3]$  at 29.2 mM in 150 mM  $\text{NaH}_2\text{PO}_4$  measured at 25°C.

**Table S4.** Polydispersity index (PDI) obtained from DLS measurements in 150 mM  $\text{NaH}_2\text{PO}_4$  measured at 25°C.

| Sample                                                                                                             | PDI   |
|--------------------------------------------------------------------------------------------------------------------|-------|
| 50 $\mu\text{g/mL}$ IFN $\alpha$ -2b                                                                               | 0.427 |
| 29.3 mM $[\text{C}_2\text{C}_1\text{Im}][\text{C}_4\text{F}_9\text{SO}_3]$                                         | 1.000 |
| 29.3 mM $[\text{C}_2\text{C}_1\text{Im}][\text{C}_4\text{F}_9\text{SO}_3]$ + 50 $\mu\text{g/mL}$ IFN $\alpha$ -2b  | 0.630 |
| 243.8 mM $[\text{C}_2\text{C}_1\text{Im}][\text{C}_4\text{F}_9\text{SO}_3]$                                        | 0.157 |
| 243.8 mM $[\text{C}_2\text{C}_1\text{Im}][\text{C}_4\text{F}_9\text{SO}_3]$ + 50 $\mu\text{g/mL}$ IFN $\alpha$ -2b | 0.279 |
| 29.8 mM $[\text{N}_{1112}(\text{OH})][\text{C}_4\text{F}_9\text{SO}_3]$                                            | 0.784 |
| 29.8 mM $[\text{N}_{1112}(\text{OH})][\text{C}_4\text{F}_9\text{SO}_3]$ + 50 $\mu\text{g/mL}$ IFN $\alpha$ -2b     | 0.628 |
| 248.0 mM $[\text{N}_{1112}(\text{OH})][\text{C}_4\text{F}_9\text{SO}_3]$                                           | 0.543 |
| 248.0 mM $[\text{N}_{1112}(\text{OH})][\text{C}_4\text{F}_9\text{SO}_3]$ + 50 $\mu\text{g/mL}$ IFN $\alpha$ -2b    | 0.849 |

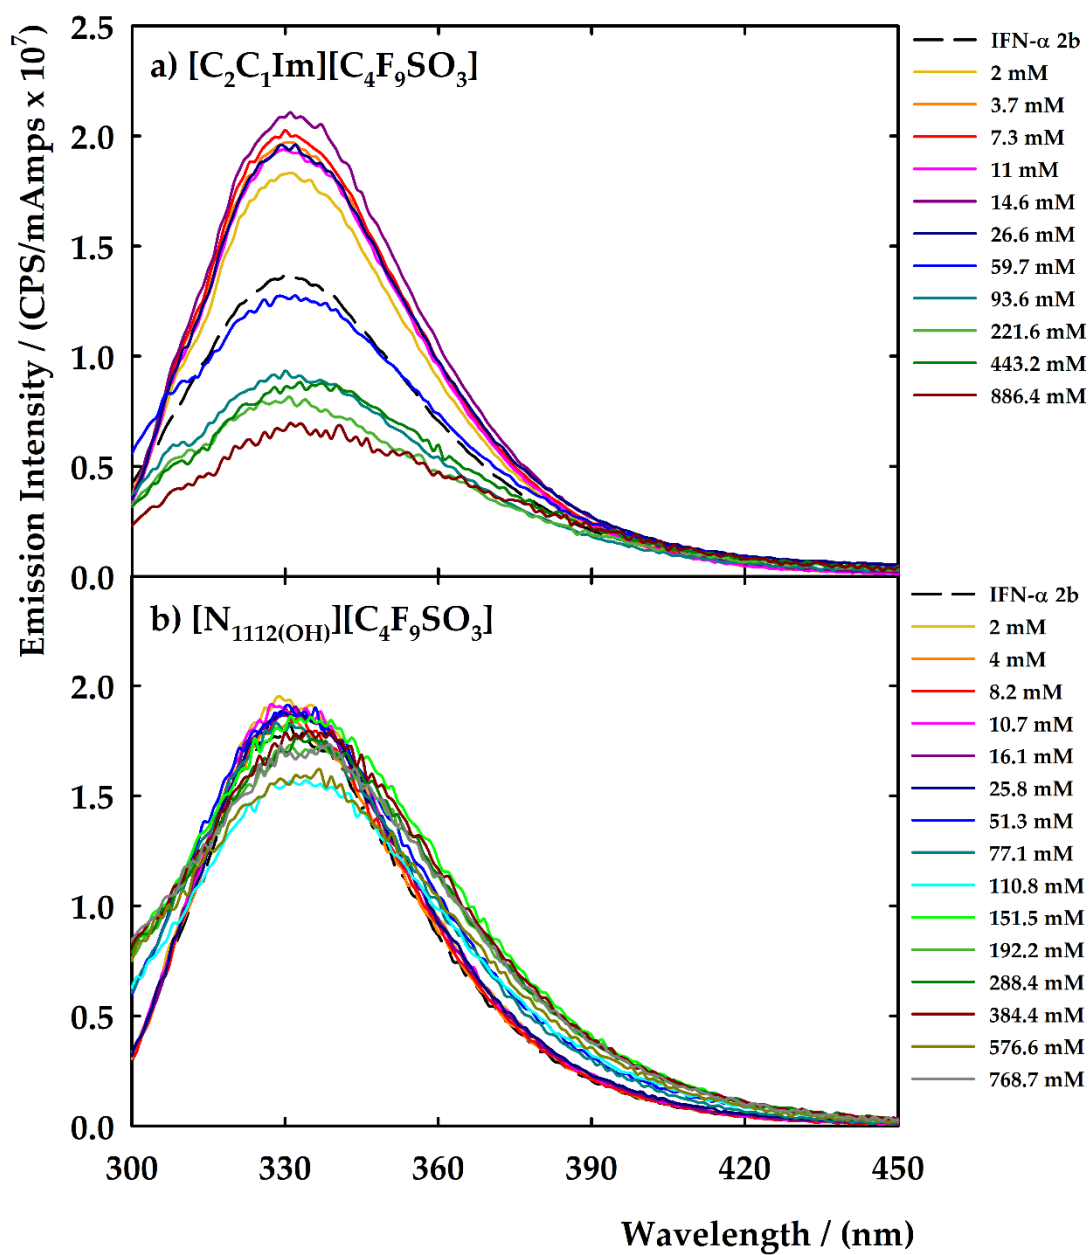

**Figure S6.** Fluorescence spectra of IFN- $\alpha$  2b (20  $\mu$ g/mL, black dashed line) with a)  $[\text{C}_2\text{C}_1\text{Im}][\text{C}_4\text{F}_9\text{SO}_3]$  and b)  $[\text{N}_{1112}(\text{OH})][\text{C}_4\text{F}_9\text{SO}_3]$  at different concentrations. All samples were prepared in 5 mM  $\text{NaH}_2\text{PO}_4$  at pH = 7.4 and measured at 25°C.

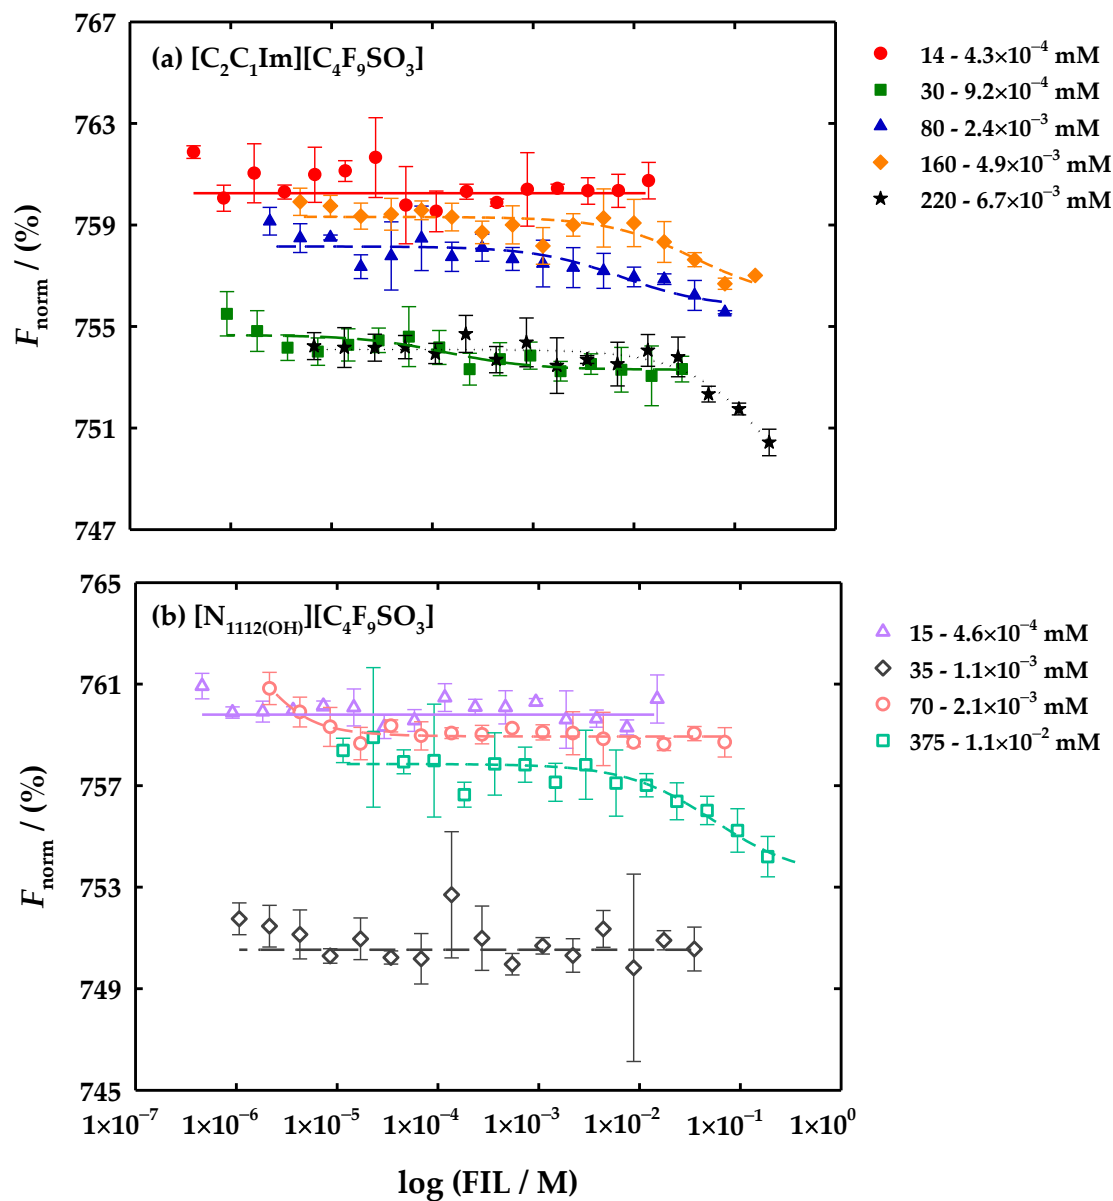

**Figure S7.** Dose-response curve from MST of labelled IFN- $\alpha$  at 2.7  $\mu\text{M}$  in the presence of different ranges of concentrations of a)  $[\text{C}_2\text{C}_1\text{Im}][\text{C}_4\text{F}_9\text{SO}_3]$  and b)  $[\text{N}_{1112}(\text{OH})][\text{C}_4\text{F}_9\text{SO}_3]$ . All the samples were measured in 5 mM  $\text{NaH}_2\text{PO}_4$  (pH = 7.4) at 25°C. The error bars represent the standard deviations from the triplicate assays.

## References

1. Pereiro, A.B.; Araújo, J.M.M.; Teixeira, F.S.; Marrucho, I.M.; Piñeiro, M.M.; Rebelo, L.P.N. Aggregation behavior and total miscibility of fluorinated ionic liquids in water. *Langmuir* **2015**, *31*, 1283–1295. <https://doi.org/10.1021/la503961h> (reference 38 of the paper)
